# Supplementary material for: Physicochemical insights into the micelle-based drug-delivery of bioactive compounds to the carrier protein
Source: Royal Society of Chemistry journal article supplement (doi:10.1039/d2nj04244d), 2022-01-01
Supplement: d2nj04244d1.pdf [file d2nj04244d1.pdf]

Supplementary Information

Figure S1

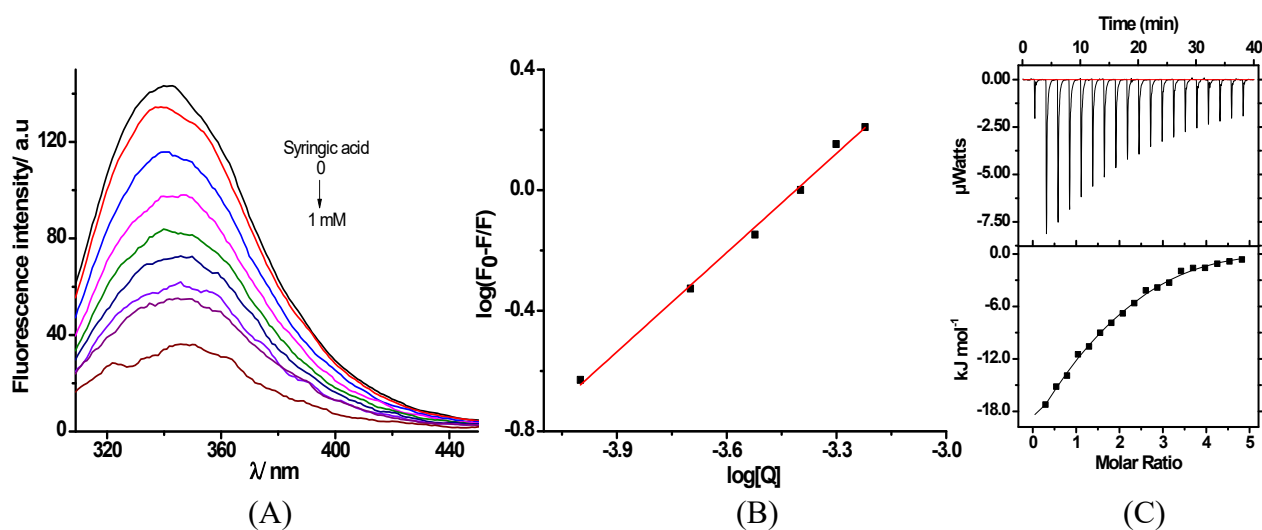

**Figure S1:** Delivery of syringic acid to HSA through HTAB monomers studied by (A) fluorescence quenching of 20 μM HSA when the concentration of syringic acid was increased, (B) modified Stern-Volmer plot and (C) ITC plot at for the titration of 2.25 mM syringic acid dissolved in HTAB monomers with 0.09 mM HSA at 298.15K.

Figure S2

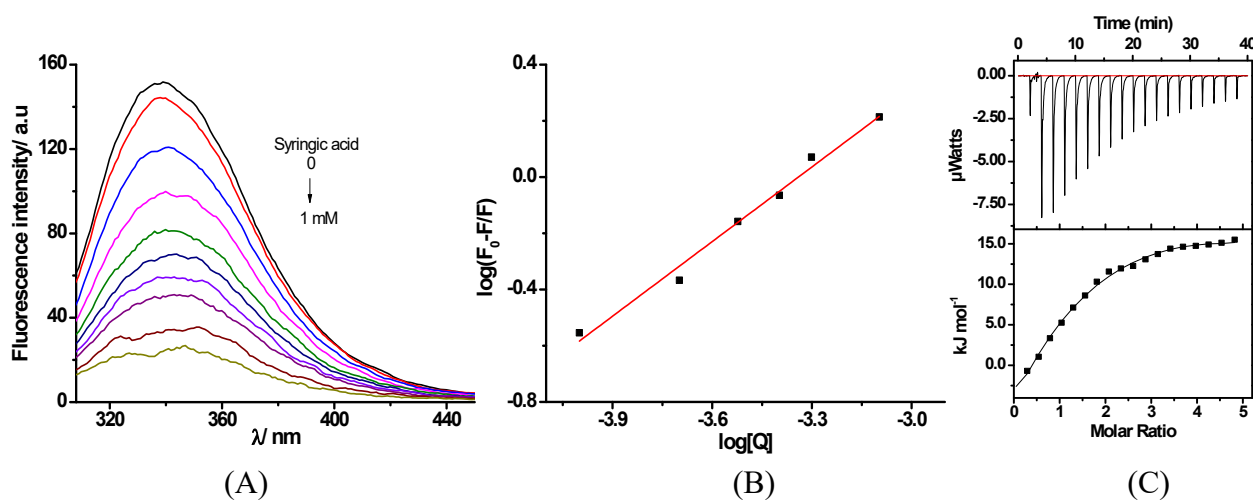

**Figure S2:** Delivery of syringic acid to HSA through TX-100 monomers studied by (A) fluorescence quenching of 20  $\mu\text{M}$  HSA when the concentration of syringic acid was increased, (B) modified Stern-Volmer plot and (C) ITC plot at for the titration of 2.25 mM syringic acid dissolved in TX-100 monomers with 0.09 mM HSA at 298.15K.

Figure S3

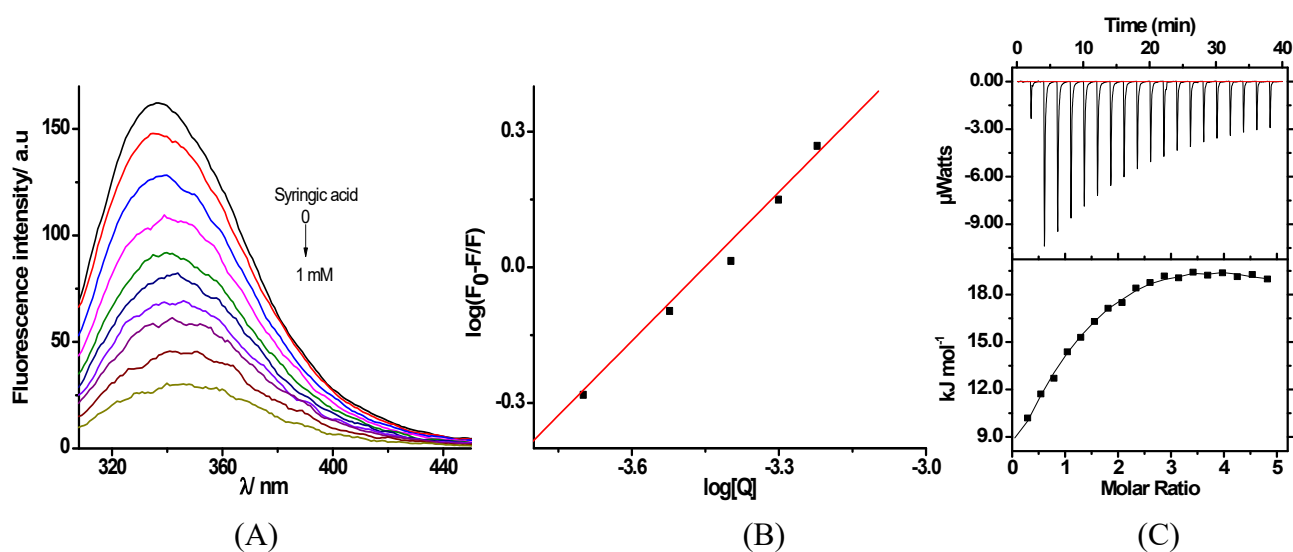

**Figure S3:** Delivery of syringic acid to HSA through mixed (HTAB+TX-100) monomers studied by (A) fluorescence quenching of 20  $\mu$ M HSA when the concentration of syringic acid was increased, (B) modified Stern-Volmer plot and (C) ITC plot at for the titration of 2.25 mM syringic acid dissolved in mixed (HTAB+TX-100) monomers with 0.09 mM HSA at 298.15K.
